# Supplementary material for: Splice variants of the CaV1.3 L-type calcium channel regulate dendritic spine morphology
Source: PubMed Central journal article supplement (PMC5052568; doi:10.1038/srep34528), 2016-10-06
Supplement: srep34528-s1.pdf [file srep34528-s1.pdf]

## Supplementary Information

*Splice variants of the Ca<sub>v</sub>1.3 L-type calcium channel regulate dendritic spine morphology*  
by Ruslan Stanika, Marta Campiglio, Alexandra Pinggera, Amy Lee, Jörg Striessnig,  
Bernhard E. Flucher, and Gerald J. Obermair

**Supplementary Tab. S1.** Current properties of endogenous and residual (blocked) as well as Ca<sub>v</sub>1.3<sub>L</sub><sup>DHP-</sup> and Ca<sub>v</sub>1.3<sub>ΔITTL</sub><sup>DHP-</sup> calcium channels.

|                         | Endogenous |      |    | Block |      |    |
|-------------------------|------------|------|----|-------|------|----|
|                         | Mean       | ±SEM | n  | Mean  | ±SEM | n  |
| CD (pA/pF)              | -75.3      | 5.8  | 14 | -4.1  | 1.0  | 14 |
| V <sub>50act</sub> (mV) | -17.2      | 2.2  | 14 | 7.1   | 3.0  | 14 |
| V <sub>rev</sub> (mV)   | 50.7       | 1.2  | 14 | 21.6  | 3.9  | 14 |

  

|                         | Block+Ca <sub>v</sub> 1.3 <sub>L</sub> <sup>DHP-</sup> |      |    | Block+Ca <sub>v</sub> 1.3 <sub>ΔITTL</sub> <sup>DHP-</sup> |      |    |
|-------------------------|--------------------------------------------------------|------|----|------------------------------------------------------------|------|----|
|                         | Mean                                                   | ±SEM | n  | Mean                                                       | ±SEM | n  |
| CD (pA/pF)              | -15.4                                                  | 1.6  | 25 | -24.6                                                      | 3.8  | 12 |
| V <sub>50act</sub> (mV) | -7.2                                                   | 1.6  | 25 | -9.8                                                       | 1.1  | 12 |
| V <sub>rev</sub> (mV)   | 33.6                                                   | 2.1  | 25 | 37.5                                                       | 3.0  | 12 |

CD, current density; V<sub>50act</sub>, half-maximal voltage of activation; V<sub>rev</sub>, reversal potential. Statistics for CD: ANOVA: F<sub>(3, 61)</sub>=90.6; p<0.001; Holm-Sidak posthoc analysis: Endogenous vs Block, p<0.001; Block vs Block+Ca<sub>v</sub>1.3<sub>L</sub><sup>DHP-</sup>, p=0.019; Block+Ca<sub>v</sub>1.3<sub>L</sub><sup>DHP-</sup> vs Block+Ca<sub>v</sub>1.3<sub>ΔITTL</sub><sup>DHP-</sup>, p=0.042.

**Supplementary Tab. S2.** Current properties of Ca<sub>v</sub>1.3<sub>L</sub><sup>DHP-</sup> and Ca<sub>v</sub>1.3<sub>ΔITTL</sub><sup>DHP-</sup> co-expressed with densin-180 and shank1b.

|                         |         | Block+Ca <sub>v</sub> 1.3 <sub>L</sub> <sup>DHP-</sup> |      |    | Block+Ca <sub>v</sub> 1.3 <sub>ΔITTL</sub> <sup>DHP-</sup> |      |    |
|-------------------------|---------|--------------------------------------------------------|------|----|------------------------------------------------------------|------|----|
|                         |         | Mean                                                   | ±SEM | n  | Mean                                                       | ±SEM | n  |
| CD (pA/pF)              | Control | -15.4                                                  | 1.6  | 25 | -24.6                                                      | 3.8  | 12 |
|                         | +Densin | -23.3                                                  | 3.0  | 10 | -20.7                                                      | 2.4  | 12 |
|                         | +Shank  | -17.8                                                  | 1.6  | 16 | -                                                          | -    | -  |
| V <sub>50act</sub> (mV) | Control | -7.2                                                   | 1.5  | 25 | -9.8                                                       | 1.1  | 12 |
|                         | +Densin | -13.1                                                  | 1.8  | 10 | -6.9                                                       | 0.9  | 12 |
|                         | +Shank  | -7.0                                                   | 0.9  | 16 | -                                                          | -    | -  |
| V <sub>rev</sub> (mV)   | Control | 33.6                                                   | 2.1  | 25 | 37.5                                                       | 3    | 12 |
|                         | +Densin | 39.2                                                   | 2.6  | 10 | 39.1                                                       | 2.0  | 12 |
|                         | +Shank  | 35.8                                                   | 1.4  | 16 | -                                                          | -    | -  |

CD, current density; V<sub>50act</sub>, half-maximal voltage of activation; V<sub>rev</sub>, reversal potential. For statistics, which was performed on the data normalized to the respective control experiments, see text.

**Supplementary Figure S1. The extracellular HA-tag does not affect current properties and surface expression of  $\text{Ca}_v1.3_L$**

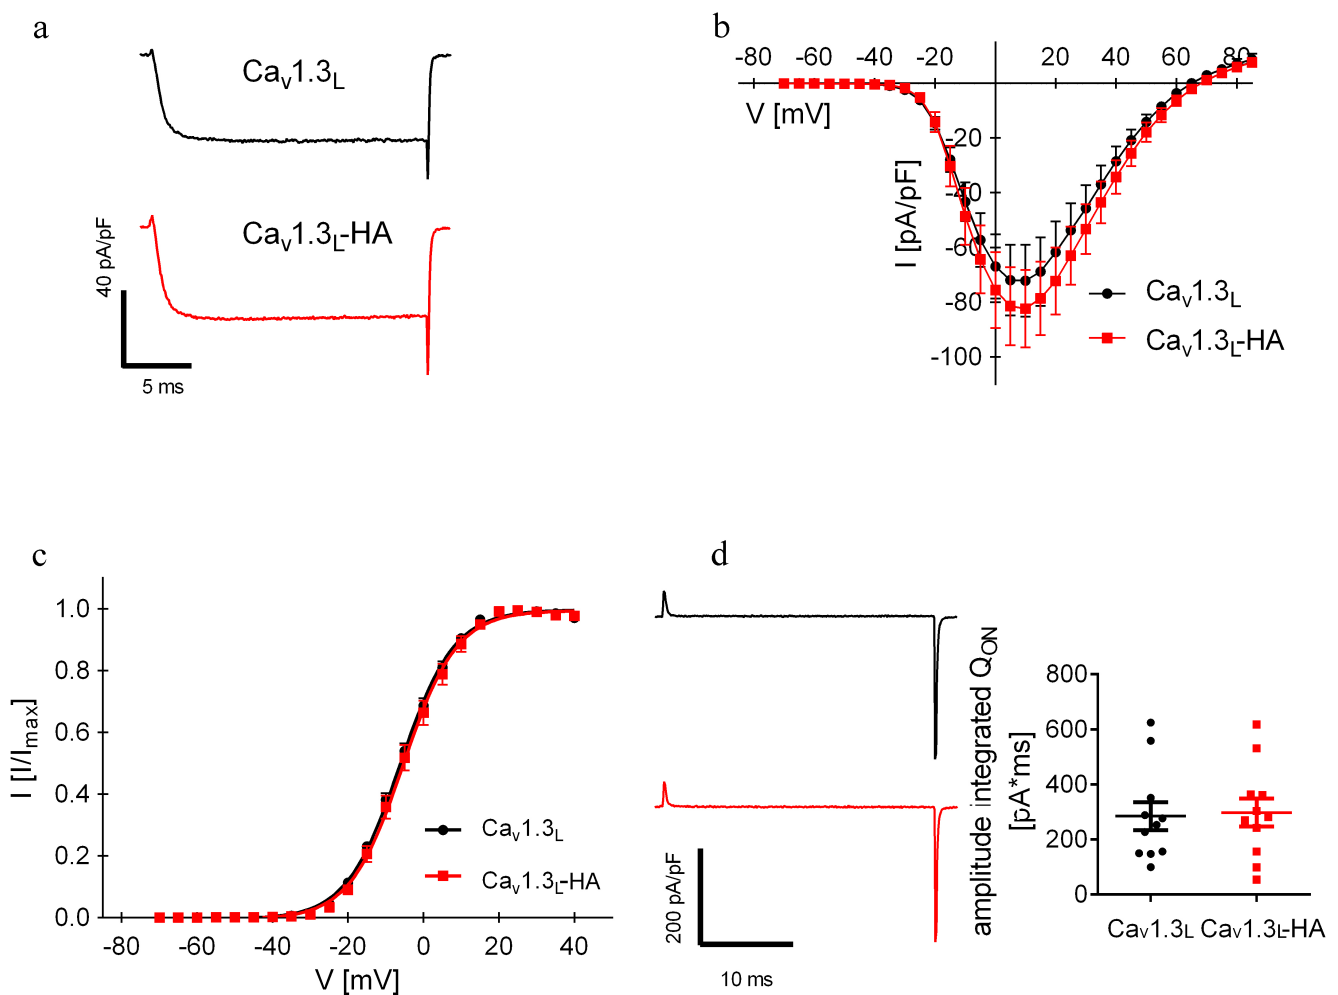

Current properties of  $\text{Ca}_v1.3_L$  and  $\text{Ca}_v1.3_L$ -HA channels expressed in tsA-201 cells. **a,b**, Representative  $\text{Ba}^{2+}$  whole-cell currents (**a**) and  $I/V$ -curves (**b**) recorded from tsA-201 cells transfected with the respective  $\text{Ca}_v1.3_L$  construct plus  $\beta_{4b}$ ,  $\alpha_2\delta$ -1, and eGFP are indistinguishable for wildtype ( $n=16$ ) and HA-tagged ( $n=15$ )  $\text{Ca}_v1.3_L$ . **c**, Identical steady-state activation curves for  $\text{Ca}_v1.3_L$  and  $\text{Ca}_v1.3_L$ -HA show no effect of the HA-tag on the voltage-dependence of activation. **d**, Representative ON-gating charges (left panel) and amplitudes of integrated ON-gating charges ( $Q_{\text{ON}}$ , right panel) recorded at the reversal potential for  $\text{Ca}_v1.3_L$  and  $\text{Ca}_v1.3_L$ -HA ( $n=11$  for both). Horizontal bars represent means  $\pm$  SEM. Data from three independent transfections. Statistics: unpaired Student's  $t$ -test (b, peak current density,  $p=0.559$ ; c,  $V_{50\text{act}}$ ,  $p=0.405$ ; d, amplitudes of integrated  $Q_{\text{ON}}$ ,  $p=0.618$ ).

**Supplementary Figure S2. Postsynaptic localization of the GFP-fusion proteins densin-180 and shank1b.**

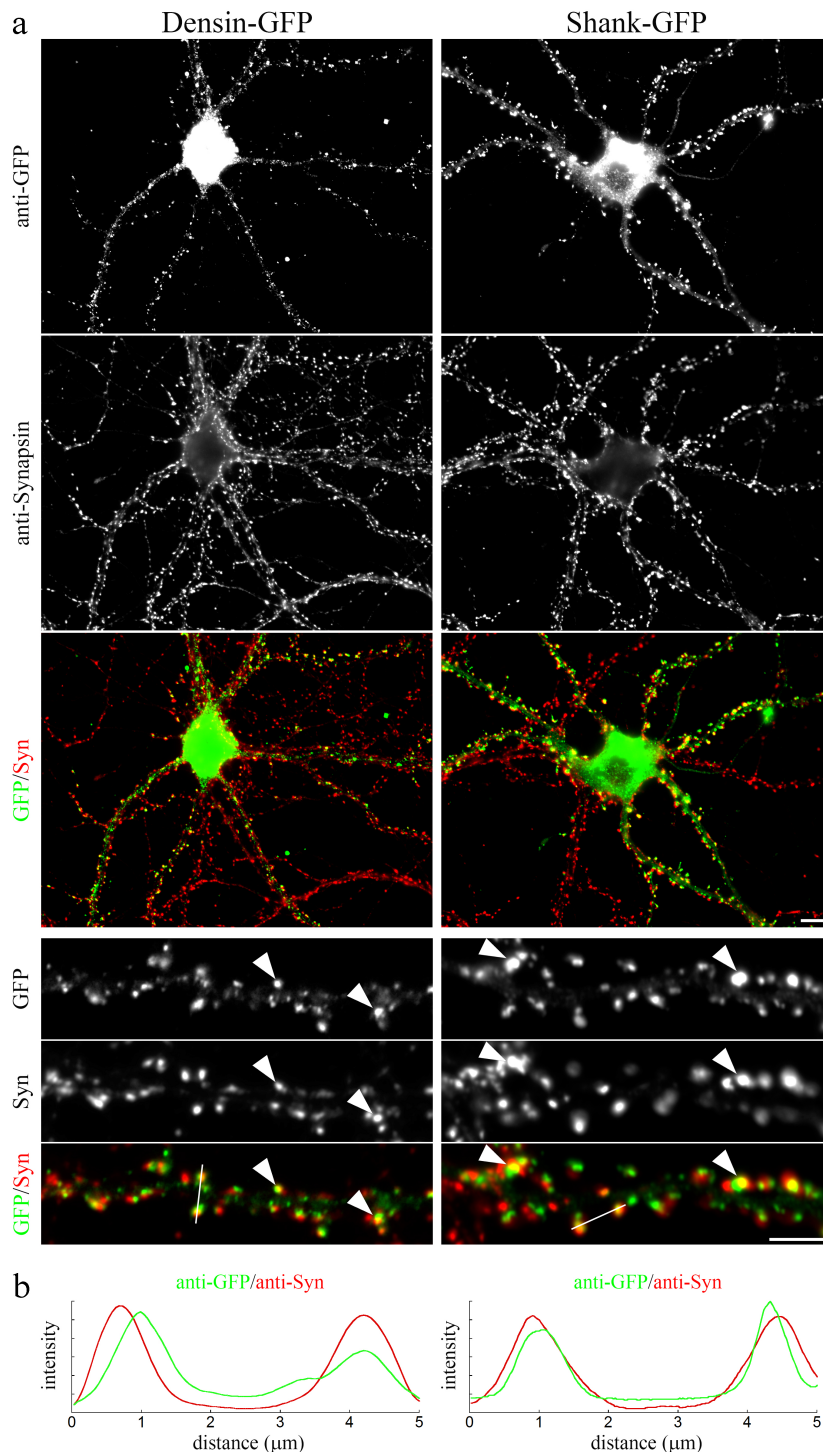

**a**, Hippocampal neurons were transfected with densin-180-GFP or GFP-shank1b and labeled with anti-GFP and anti-synapsin-1. Both, densin and shank, show a punctate localization pattern along the dendrites. The close-apposition of presynaptic boutons labeled with synapsin in magnified dendritic segments shows the postsynaptic localization of these two PDZ domain proteins (examples indicated by arrowheads). **b**, Line scan analyses further corroborates the apposition of postsynaptic densin-GFP and GFP-shank1b with the presynaptic synapsin. Scale bars, 10  $\mu\text{m}$  (overview) and 5  $\mu\text{m}$ .

**Supplementary Figure S3. Expression of PDZ-domain proteins densin-180 and shank1b in hippocampal neurons does not alter dendritic spine morphology**

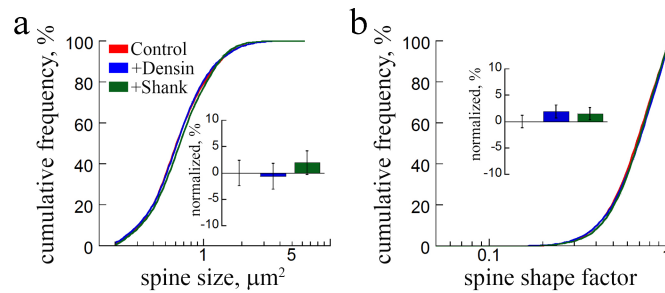

Quantitative analysis of morphological dendritic spines parameters upon expression of densin-180 or shank1b in cultured hippocampal neurons. Graphs show the cumulative frequency distribution of spines by size (*a*) and shape factor (*b*) as well as the fractional change (% difference to control, insets) induced by PDZ-domain proteins compared to the control condition (eGFP only). Kruskal-Wallis ANOVA, spine size:  $H_2=3.56$ ,  $p=0.169$ ; spine shape factor:  $H_2=1.57$ ,  $p=0.456$ .

**Supplementary Figure S4. Strongly reduced dihydropyridine sensitivity in DHP-insensitive  $Ca_v1.3_L^{DHP-}$  and  $Ca_v1.3_{\Delta ITTL}^{DHP-}$**

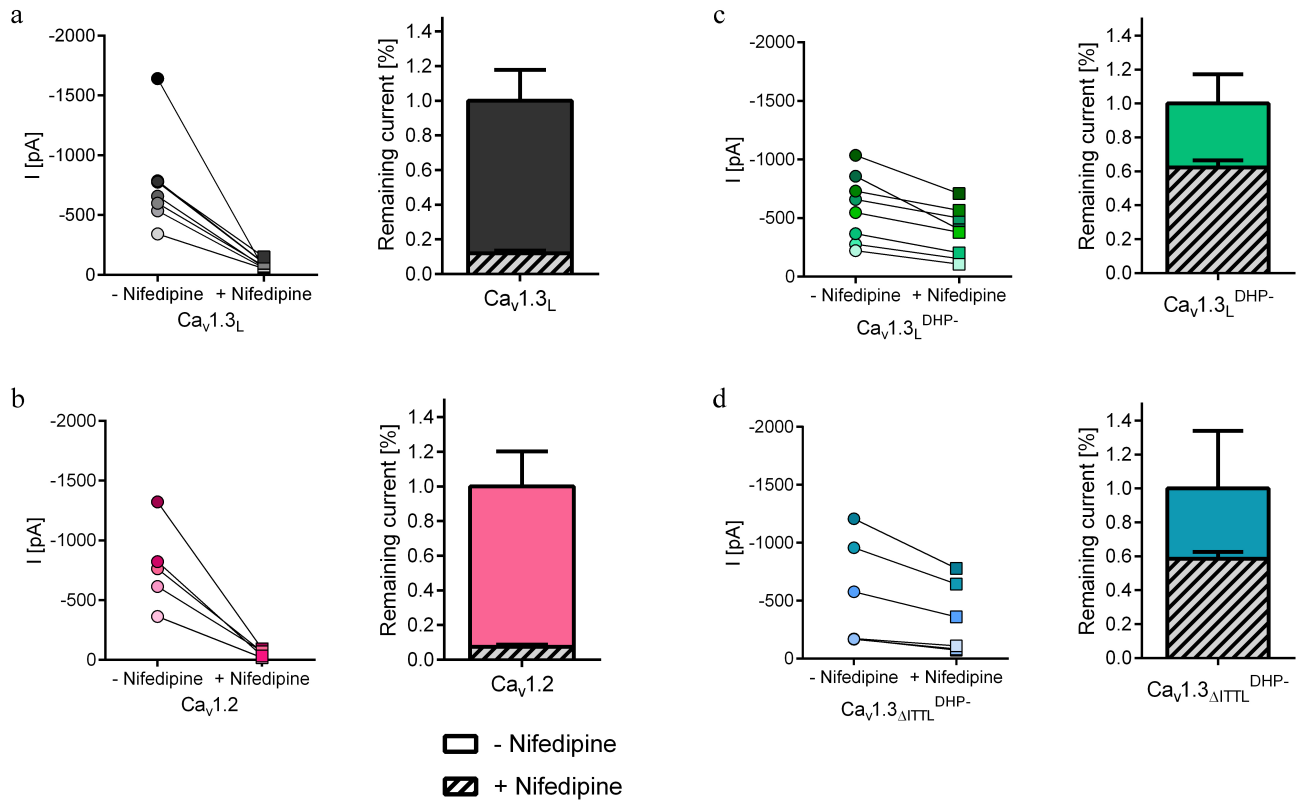

For testing the DHP sensitivity wildtype  $Ca_v1.3_L$  (a),  $Ca_v1.2$  (b), and the DHP-insensitive mutants  $Ca_v1.3_L^{DHP-}$  (c) and  $Ca_v1.3_{\Delta ITTL}^{DHP-}$  (d) channel constructs plus  $\beta_{4b}$ ,  $\alpha_2\delta-1$ , and eGFP were expressed in tsA-201 cells and a bath solution containing 30  $\mu$ M nifedipine was applied after at least four constant control sweeps during perfusion with bath solution only. To assess the effect of 30  $\mu$ M nifedipine on different constructs, cells were depolarized from a holding potential of -50 mV to  $V_{max}$  for 100 ms at 0.1 Hz and peak currents before and 30 s after nifedipine application, which was sufficient to reach steady-state inhibition, were analyzed. Left panels: Peak currents for each individual cell (dots connected by a solid line) before and after nifedipine application; right panels: Fraction of remaining currents after nifedipine application normalized to the peak currents before nifedipine application [mean $\pm$ sem]. Peak currents were reduced to 12% ( $Ca_v1.3_L$ , n=8), 62% ( $Ca_v1.3_L^{DHP-}$ , n=8), 59% ( $Ca_v1.3_{\Delta ITTL}^{DHP-}$ , n=6), and 7% ( $Ca_v1.2$ , n=5). Differences in remaining current were highly significant between  $Ca_v1.3_L$  and the DHP-insensitive mutants  $Ca_v1.3_L^{DHP-}$  and  $Ca_v1.3_{\Delta ITTL}^{DHP-}$  ( $p < 0.001$ ), but not between  $Ca_v1.3_L^{DHP-}$  and  $Ca_v1.3_{\Delta ITTL}^{DHP-}$  ( $p < 0.85$ ). ANOVA with Holm-Sidak posthoc analysis,  $F_3=81.8$ ,  $p < 0.001$ .
